# Supplementary material
Source: publisher figshare collection journal article supplement (https://tandf.figshare.com/ndownloader/files/20019905)
Supplement: Supplementary file 1 [file 20019905]

**Supporting information**

**Highly efficient green synthesis of the photochromic spironaphthoxazines using an eco-friendly choline hydroxide catalyst**

Shailesh N. Vajekarb, Ganapati S. Shankarling a,*

a,bDepartment of Dyestuff Technology, Institute of Chemical Technology, N. P. Marg, Matunga, Mumbai-400019, Maharashtra, India.

*a*E-mail: gsshankarling@gmail.com *aORCID ID :* [*0000-0002-1727-7941*](https://orcid.org/0000-0002-1727-7941)

*b*E-mail: shaileshchem81@gmail.com *bORCID ID : 0000-0003-0321-3864*

| **Content** | **Pages** |
| --- | --- |
| Experimental section | 2-4 |
| Characterization data for all the compounds | 4-6 |
| 1H NMR spectra of the compounds | 7-11 |

1. **Experimental Section**

**Materials and methods**

All the required chemicals were purchased from s d Fine-Chem Limited and utilized without additional purification. The advancement of all reactions was checked by aluminium TLC plate, silica gel coated with fluorescent indicator F254 (Merck) identifying the spots with the help of UV light as a visualizing agent. 1H NMR spectra were obtained on a 500 MHz instrument (Agilent NMR spectrometer) and 400MHz (Bruker Ultrashield Plus NMR spectrometer) in CDCl3 or DMSO-*d6* solvent at ambient temperature. We have mentioned the chemical shifts values on δ scale (ppm) relative to an internal standard tetramethylsilane [Si(CH3)4 = 0.00 ppm]. Infrared spectra were obtained with a JASCO-FT/IR 4100 LE ATR PRO450-S spectrometer. All the synthesized derivatives were analyzed by 1H NMR spectra and melting points. Melting points were recorded on standard melting point instrument bought from Sunder Industrial Product, Mumbai and are uncorrected.

**General method for the preparation of choline hydroxide (ChOH)**

The Choline hydroxide was prepared as per the literature.[17] The solution of choline chloride (10 mmol), KOH (10 mmol) and methyl alcohol (15 mL) was heated at 60 0C for 12 h using continuous stirring. Solution was then cooled to rt and filtered later on to remove precipitated KCl. Eventually, the filtrate was concentrated by means of vacuum to get rid of methyl alcohol. The residue obtained was utilized without additional purification (Scheme 4).

**General method for the synthesis of spironaphthoxazines**

A mixture of indolium iodide **1** (1.0 mmol) and choline hydroxide (10 mol %) in water (3 mL) was stirred at 80 °C for 20 min. Then 1-nitroso-2-naphthol **2** (1.0 mmol) was added and the resulting mixture stirred at 80°C for another 40 min. Then reaction mass was cooled to rt. The solid product was then filtered and washed with water. The synthesized product was finally purified using column chromatography technique (silica gel 100-200 mesh size) with ethyl acetate:hexane (05:95) as an eluent to give the desired spironaphthoxazine (Scheme 2 & Table 1).

1. **Characterization Data of synthesized spironaphthoxazines**

**SNO-1: 1,1,3-trimethyl-1,3-dihydrospiro[benzo[e]indole-2,3'-naphtho[2,1-b][1,4]oxazine]**

Yield: 89%; Colorless solid; mp 123-124 oC. Reported mp 125 oC(Lokshin, Samat, & Guglielmetti, 1997).

1H NMR (500 MHz, DMSO-d6) δ 8.499 (1H, d, *J* = 8.5 Hz, C10’-H), 7.968 (1H, s, C2’-H),

7.912 (1H, d, *J* = 8.6 Hz, C7’-H), 7.870-7.825 (3H, m, C6’-H, C8’-H, & C9’-H), 7.590 (1H, t, *J* = 8.3 Hz, C6-H), 7.418 (2H, m, C4 & C5’-H), 7.243 (1H, t, *J* = 8.0 Hz, C5-H), 7.075 (1H, d, *J* = 8.5 Hz, C7-H), 2.778 (3H, s, N-CH3), 1.594 (3H, s, C1-CH3), 1.472 (3H, s, C1-CH3).

**SNO-2: 1,3,3-trimethylspiro[indoline-2,3'-naphtho[2,1-b][1,4]oxazin]-9'-ol**

Yield: 87%; light brown solid; mp 209-211 0C. Reported mp 210-212 oC(Fedorova et al., 2002).

1H NMR (500 MHz, DMSO-d6) δ 7.870 (1H, s, C2’-H), 7.783 (1H, s, C10’-H), 7.659 (1H, d, *J* = 8.5 Hz, C6’-H), 7.582 (1H, d, *J* = 8.3 Hz, C7’-H), 7.243 (1H, t, *J* = 7.9 Hz, C6-H), 7.168 (1H, d, *J* = 7.8 Hz, C4-H), 7.081 (1H, d, *J* = 8.5 Hz, C5’-H), 6.981 (1H, d, *J* = 8.3 Hz, C8’-H), 6.881 (1H, t, *J* = 7.6 Hz, C5-H), 6.623 (1H, d, *J* = 7.6 Hz, C7-H), 6.231 (1H, s, O-H), 2.796 (3H, s, N-CH3), 1.381 (3H, s, C1-CH3), 1.327 (3H, s, C1-CH3).

**SNO-3: 9'-methoxy-1,3,3-trimethylspiro[indoline-2,3'-naphtho[2,1-b][1,4]oxazine]**

Yield: 83%; Yellow amorphous solid; mp 184 oC. Reported mp 185-186 oC(Lokshin et al., 1997).

1H NMR (400 MHz, CDCl3) δ 8.186 (1H, s, C2’-H), 7.787-7.748 (2H, m, C6’ & C7’-H), 7.381 (1H, s, C10’-H), 7.131-7.071 (2H, m, C4 & C6-H), 7.002-6.945 (2H, m, C5’ & 8’-H), 6.796 (1H, t, *J* = 8.0 Hz, C5-H), 6.613 (1H, d, *J* = 8.0 Hz, C7-H), 3.823 (3H, s, O-CH3), 2.891 (3H, s, N-CH3), 1.459 (3H, s, C1-CH3), 1.362 (3H, s, C1-CH3).

**SNO-4: 1,3,3-trimethylspiro[indoline-2,3'-naphtho[2,1-b][1,4]oxazin]-5'-ol**

Yield: 84%; Colorless solid; mp 105-107 oC. Reported mp 103-107 oC(Fedorova et al., 2002).

1H NMR (500 MHz, DMSO-d6) δ 8.236 (1H, s, C2’-H), 7.882 (1H, d, *J* = 8.0 Hz, C10’-H), 7.766 (1H, d, *J* = 8.4 Hz, C7’-H), 7.592-7.513 (2H, m, C9’ & C8’), 7.146 (1H, s, C6’-H), 7.061 (1H, d, *J* = 8.0 Hz, C4-H), 6.970-6.811 (2H, m, C6-H & C5-H), 6.573 (1H, d, *J* = 7.9 Hz, C7-H), 6.236 (1H, s, O-H), 2.765 (3H, s, N-CH3), 1.580 (3H, s, C1-CH3), 1.458 (3H, s, C1-CH3).

**SNO-5: 1,3,3-trimethyl-7'-nitrospiro[indoline-2,3'-naphtho[2,1-b][1,4]oxazine]**

Yield: 91%; Yellow solid; mp 127-128 0C. Reported mp 128-129 °C(Nedoshivin, V.Y., Lyubimov, A.V., Zaichenko, 1989)

1H NMR (400 MHz, CDCl3) δ 8.516 (1H, d, *J* = 8.4 Hz, C6’-H), 8.374 (1H, d, *J* = 8.2 Hz, C10’-H), 8.186 (1H, s, C2’-H), 8.003 (1H, d, *J* = 8.5 Hz, C8’-H), 7.562 (1H, t, *J* = 8.5 Hz, C9’-H), 7.292 (1H, d, *J* = 8.5 Hz, C5’-H), 7.061 (1H, d, *J* = 8.5 Hz, C4-H), 6.945 (1H, t, *J* = 8.6 Hz, C6-H), 6.796 (1H, t, *J* = 8.4 Hz, C5-H), 6.623 (1H, d, *J* = 8.5 Hz, C7-H), 2.797 (3H, s, N-CH3), 1.481 (3H, s, C1-CH3), 1.411 (3H, s, C1-CH3).

**SNO-6: 5-bromo-1,3,3-trimethylspiro[indoline-2,3'-naphtho[2,1-b][1,4]oxazine]**

Yield: 88%; Light yellow solid; mp 183-184 0C. Reported mp 182-183 0C(Jin, Li, Ma, & Li, 2010)

1H NMR (400 MHz, CDCl3) δ 8.518 (1H, d, *J* = 8.0 Hz, C10’-H), 7.885 (1H, d, *J* = 8.5 Hz, C7’-H), 7.772 (1H, s, C2’-H), 7.674 (1H, d, *J* = 8.8 Hz, C6’-H), 7.588-7.562 (1H, m, C9’-H), 7.484-7.446 (1H, m, C8’-H), 7.349 (1H, d, *J* = 8.4 Hz, C6-H), 7.061 (1H, d, *J* = 8.5 Hz, C4-H), 6.934 (1H, d, *J* = 8.8 Hz, C5’-H), 6.479 (1H, d, *J* = 8.4 Hz, C7-H), 2.728 (3H, s, N-CH3), 1.362 (3H, s, C1-CH3), 1.316 (3H, s, C1-CH3).

**SNO-7: 1,1,3-trimethyl-1,3-dihydrospiro[benzo[e]indole-2,3'-naphtho[2,1-b][1,4]oxazine]**

Yield: 87%; Colorless solid; mp 151-152 oC. Reported mp 149-151 oC(Nedoshivin, Zaichenko, Shienok, & Marevtsev, 1995)

1H NMR (500 MHz, DMSO-d6) δ 8.499 (1H, d, *J* = 8.5 Hz, C10’-H), 7.968 (1H, s, C2’-H),

7.912 (1H, d, *J* = 8.6 Hz, C9-H), 7.870-7.825 (3H, m, C7’-H, C6’-H & C5-H), 7.792 (1H, d, *J* = 7.9 Hz, C6-H), 7.590 (1H, t, *J* = 8.3 Hz, C9’-H), 7.418 (2H, m, C8 & C8’-H), 7.243 (1H, t, *J* = 7.9 Hz, C7-H), 7.152 (1H, d, *J* = 8.7 Hz, C4-H), 7.075 (1H, d, *J* = 8.9 Hz, C5’-H), 2.778 (3H, s, N-CH3), 1.594 (3H, s, C1-CH3), 1.472 (3H, s, C1-CH3).

**3. 1H spectra of the Spironaphthoxazines**

**
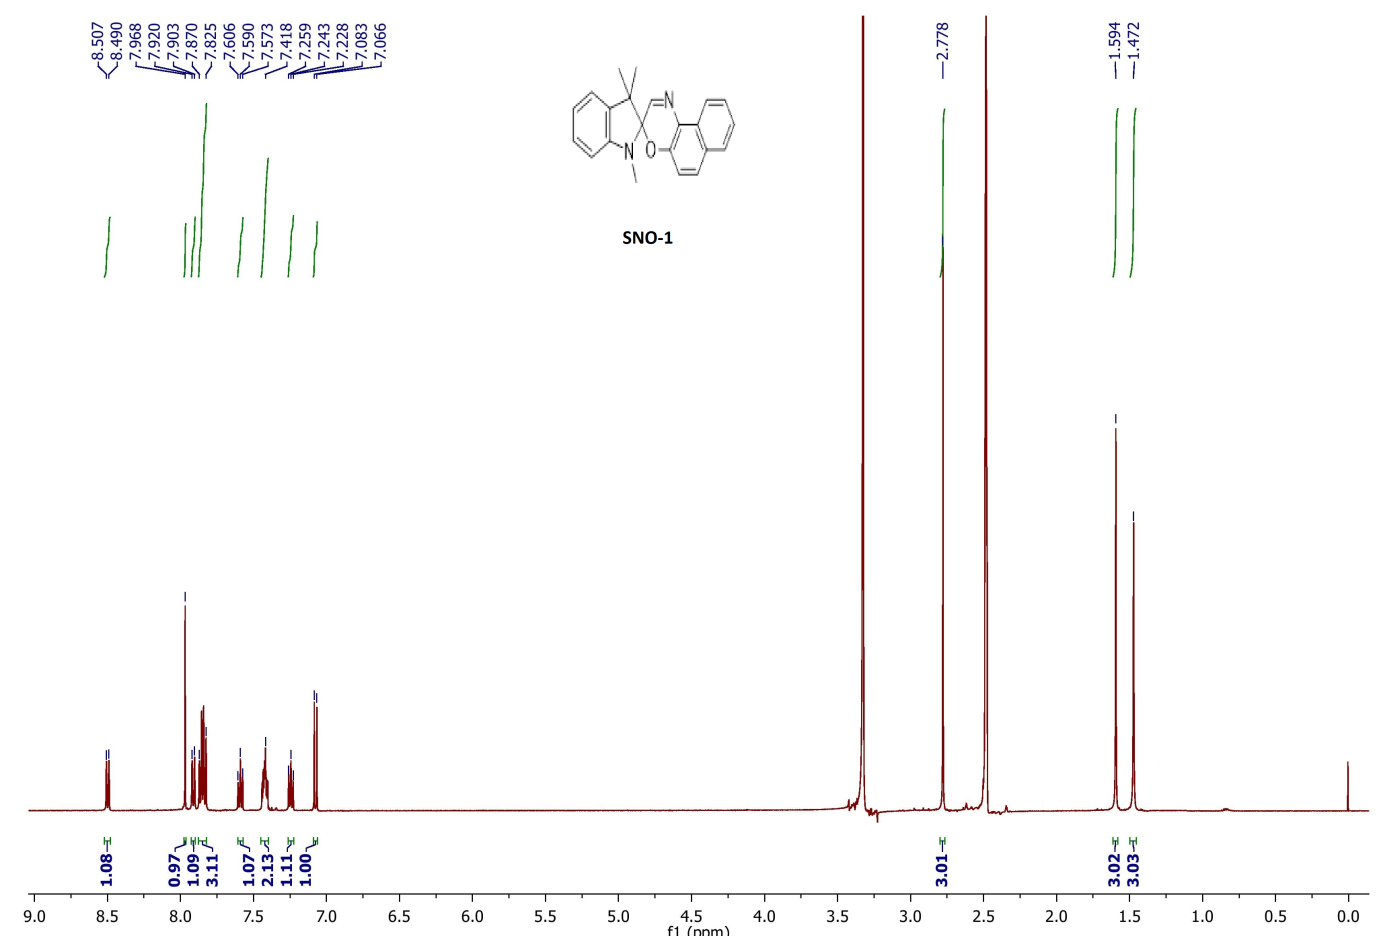
**

**
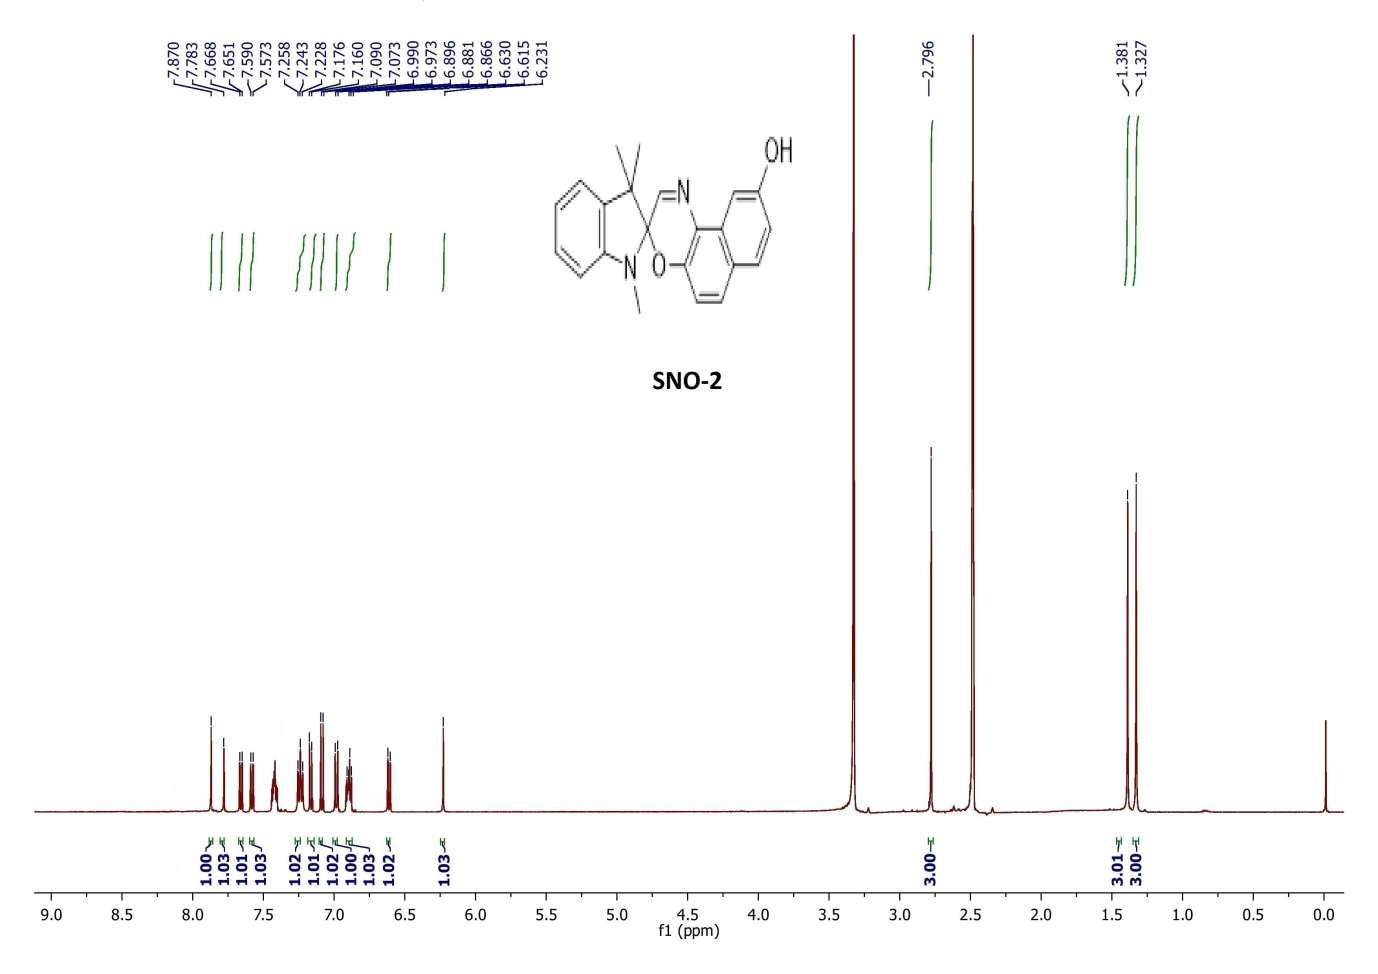
**

**
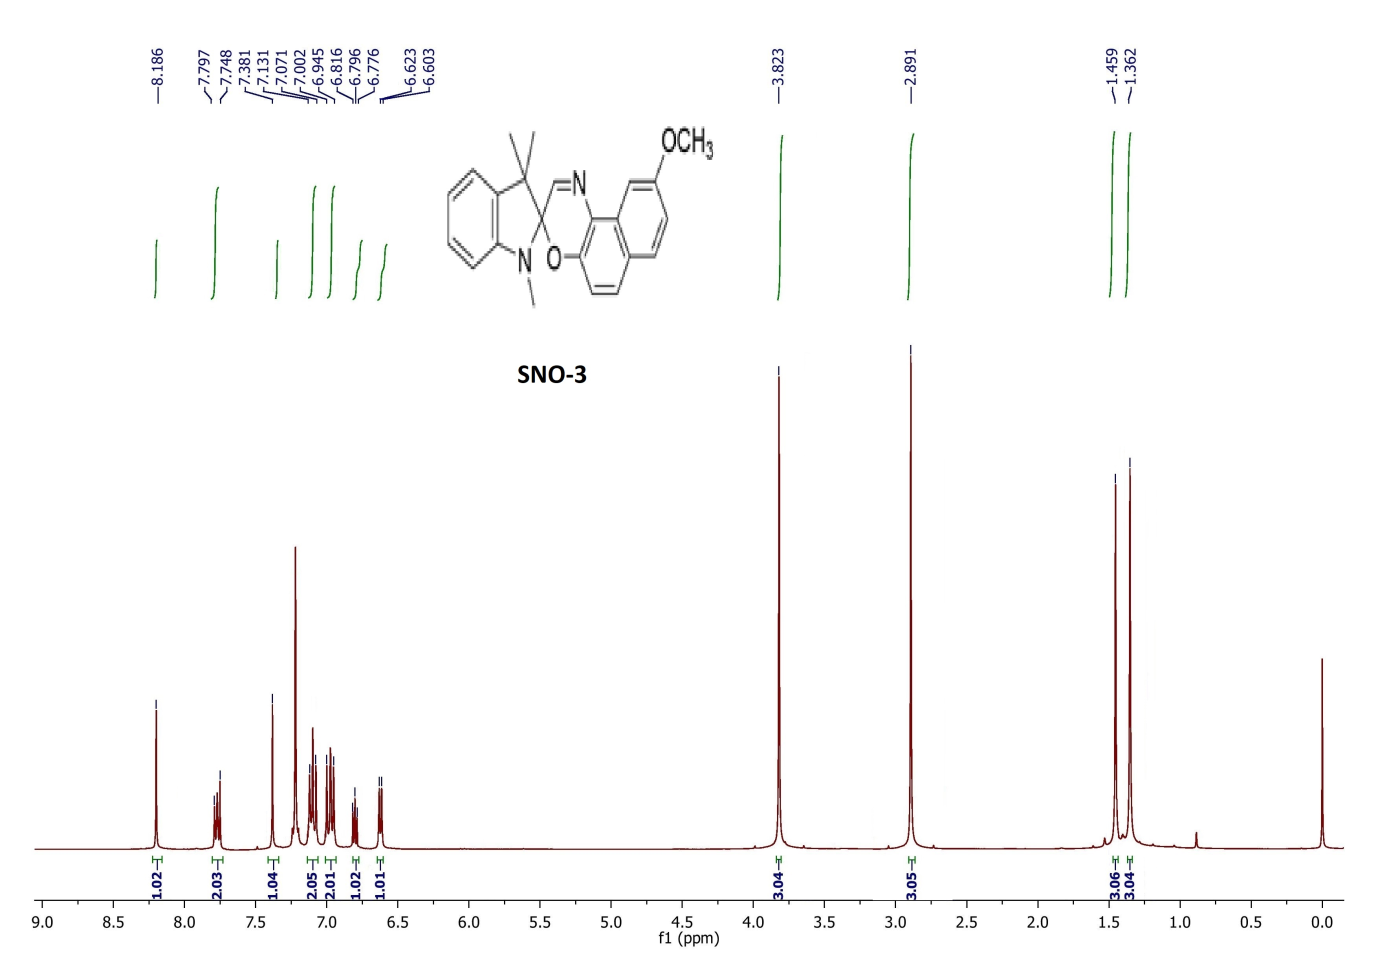
**

**
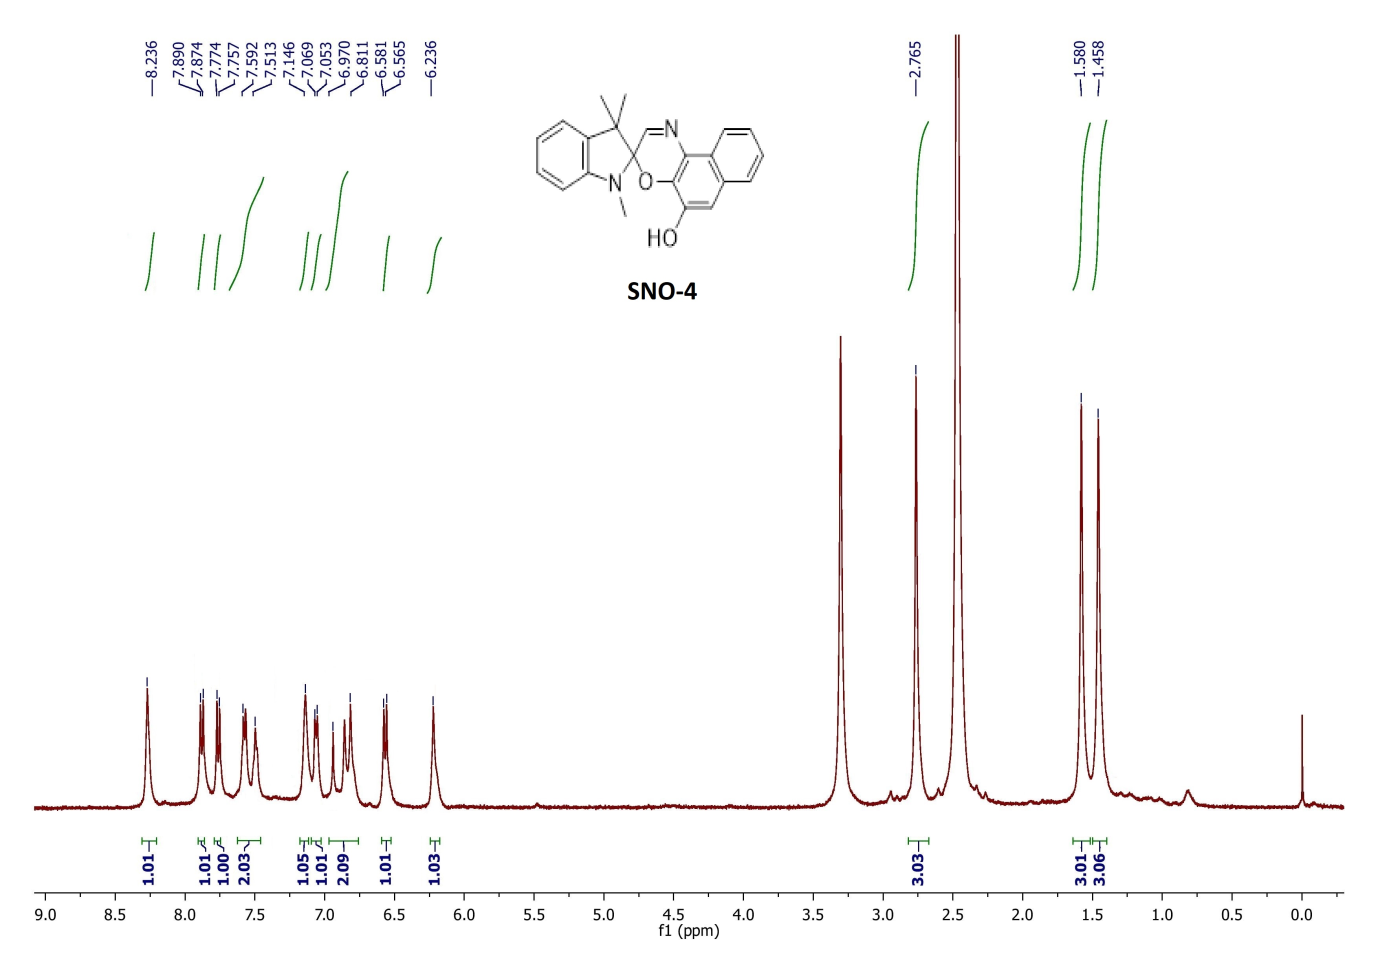
**

**
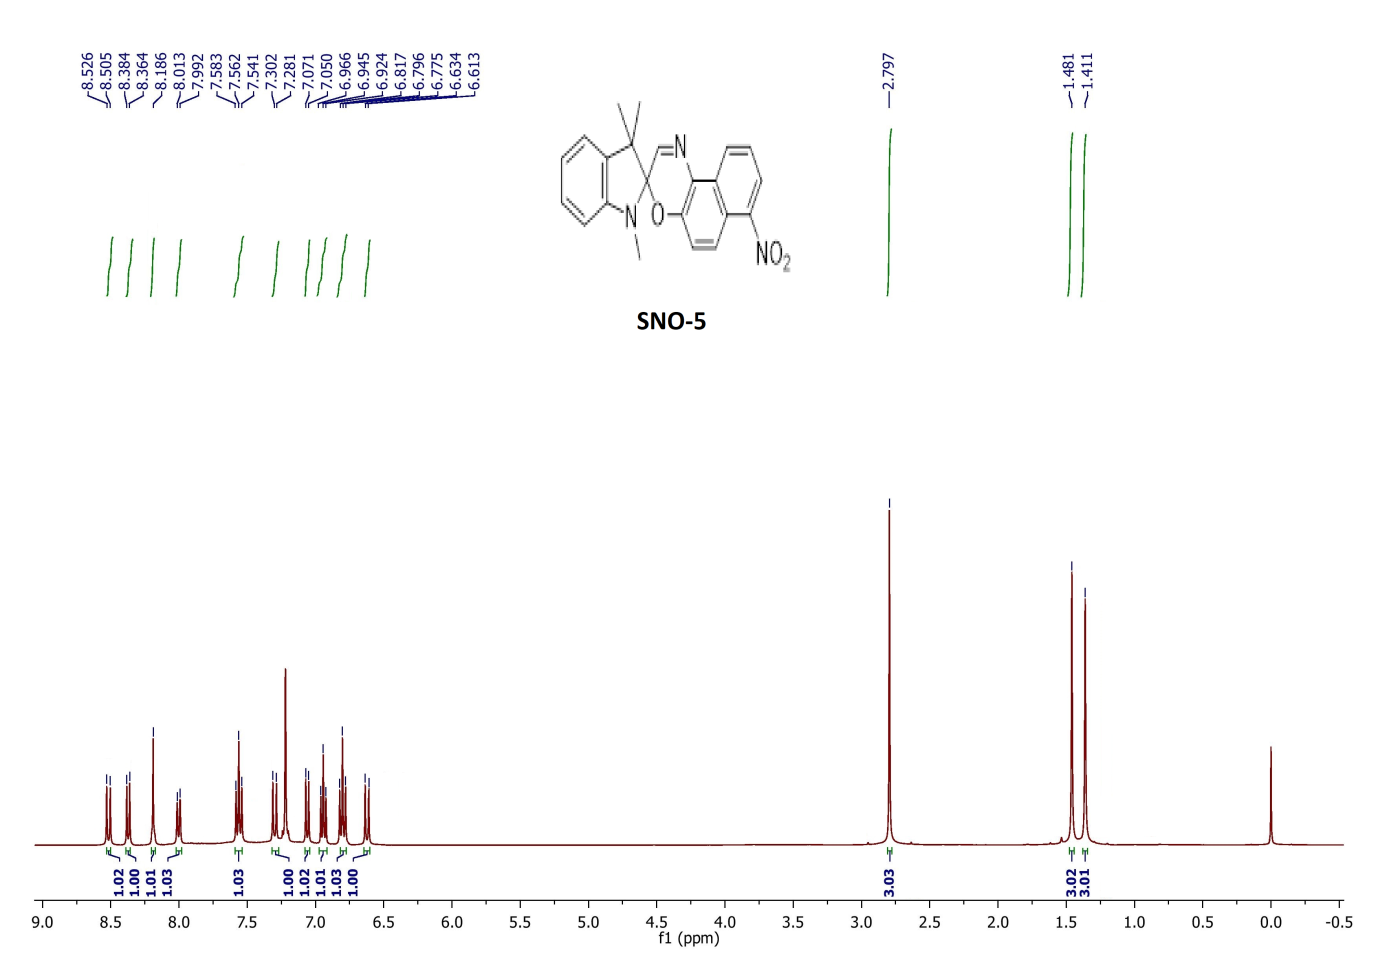
**

**
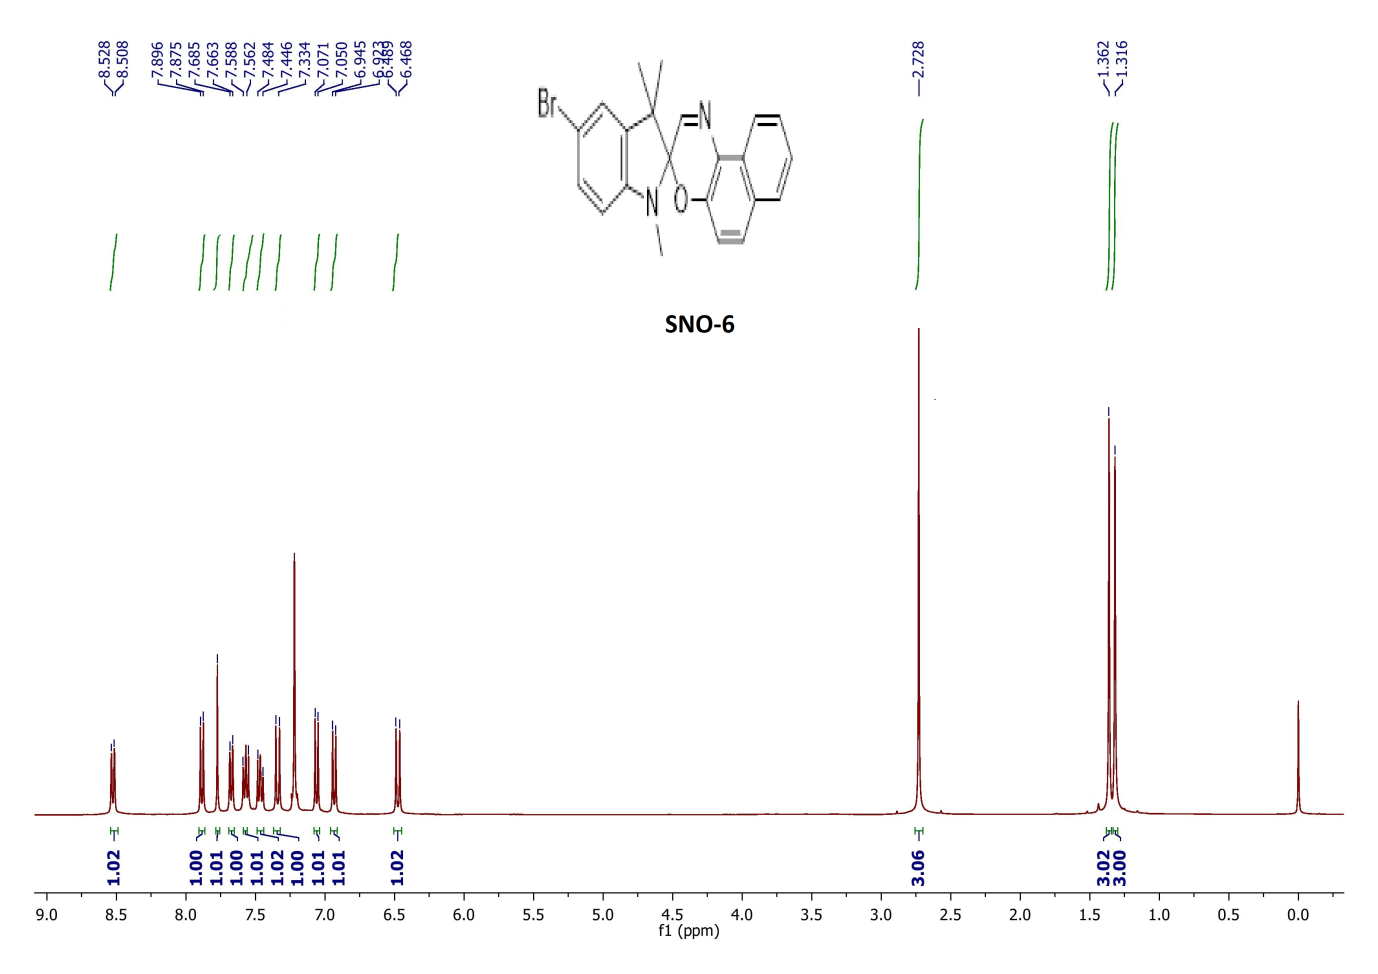
**

**
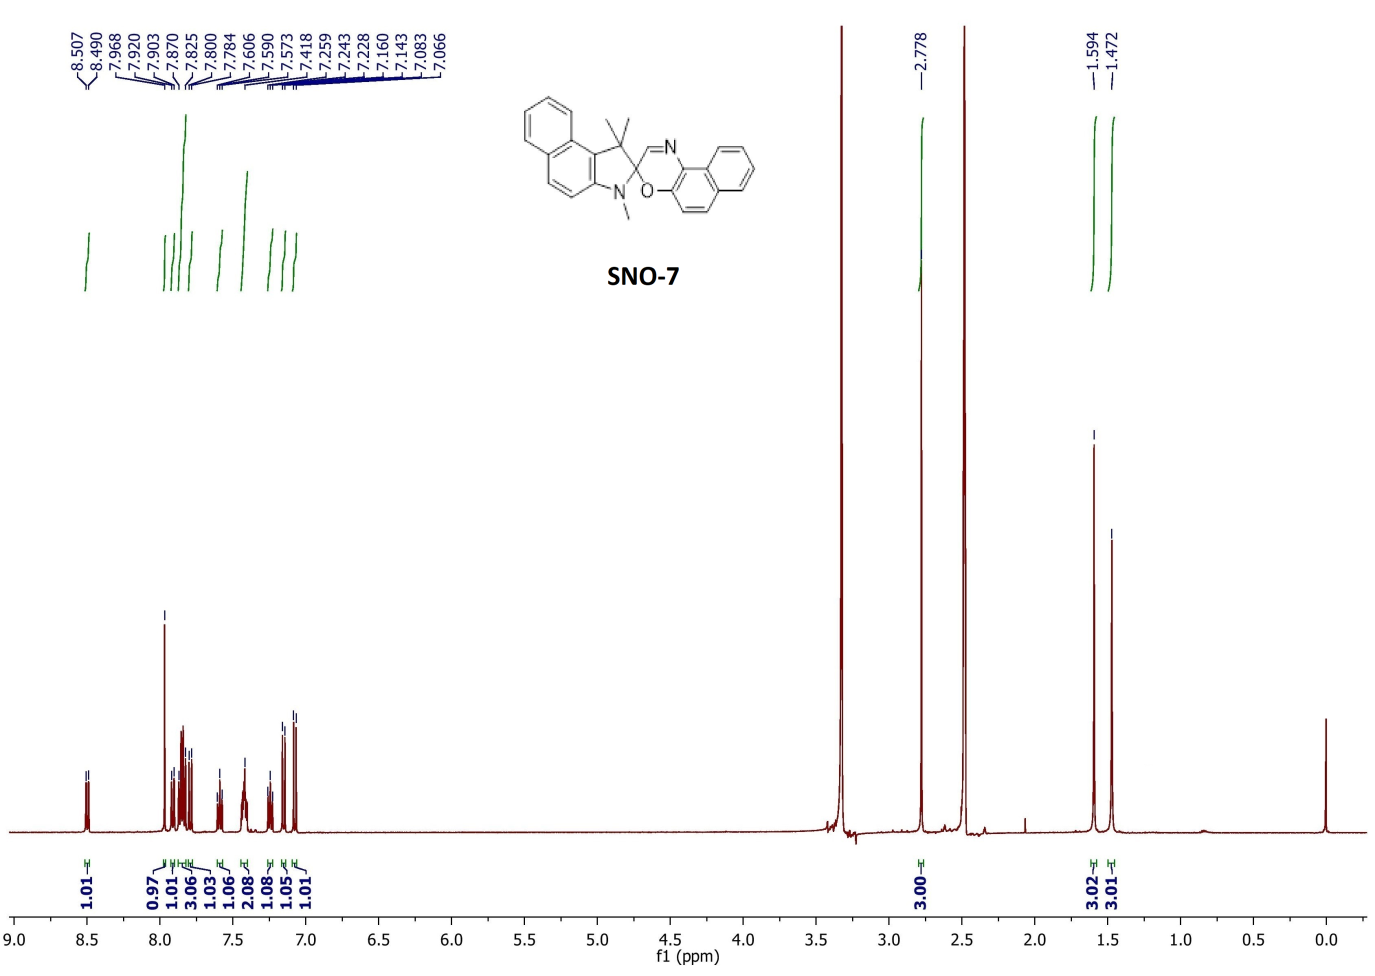
**

**References**

1. Fedorova, O. A., Gromov, S. P., Pershina, Y. V., Sergeev, S. S., Strokach, Y. P., Barachevsky, V. A., Guglielmetti, R. Novel azacrown ether-containing spiro[indoline-2,3′-naphthoxazines]: design, synthesis and cation-dependent photochromism. *J. Chem. Soc., Perkin Trans.***2002**, *2*, (3), 563–570. https://doi.org/10.1039/a905671h
2. Jin, L.-M., Li, Y., Ma, J., & Li, Q. Synthesis of Novel Thermally Reversible Photochromic Axially Chiral Spirooxazines. *Org. Lett.* **2010**, *12*(15), 3552–3555. https://doi.org/10.1021/ol1014152
3. Lokshin, V., Samat, A., & Guglielmetti, R. Synthesis of photochromic spirooxazines from 1-amino-2-naphthols. *Tetrahedron*. **1997**, *53*(28), 9669–9678. https://doi.org/10.1016/S0040-4020(97)00640-6
4. Nedoshivin, V.Y., Lyubimov, A.V., Zaichenko, N. L. Synthesis and photochromic properties of nitro-substituted spironaphthooxazines. *Bull. Acad. Sci. USSR, Div.Chem. Sci.* **1989**, *38*(11), 2363–2366. https://doi.org/10.1007/BF01168090
5. Nedoshivin, V. Y., Zaichenko, N. L., Shienok, A. I., & Marevtsev, V. S. Synthesis and photochromic properties of spiro (benzindoline-naphthoxazines). *Russ. Chem. Bull.* **1995**. *44*(4), 712–717. https://doi.org/10.1007/BF00698509
